# Supplementary material
Source: MDPI journal article supplement (https://www.mdpi.com/2077-0472/12/3/429)
Supplement: s1 [file s1]

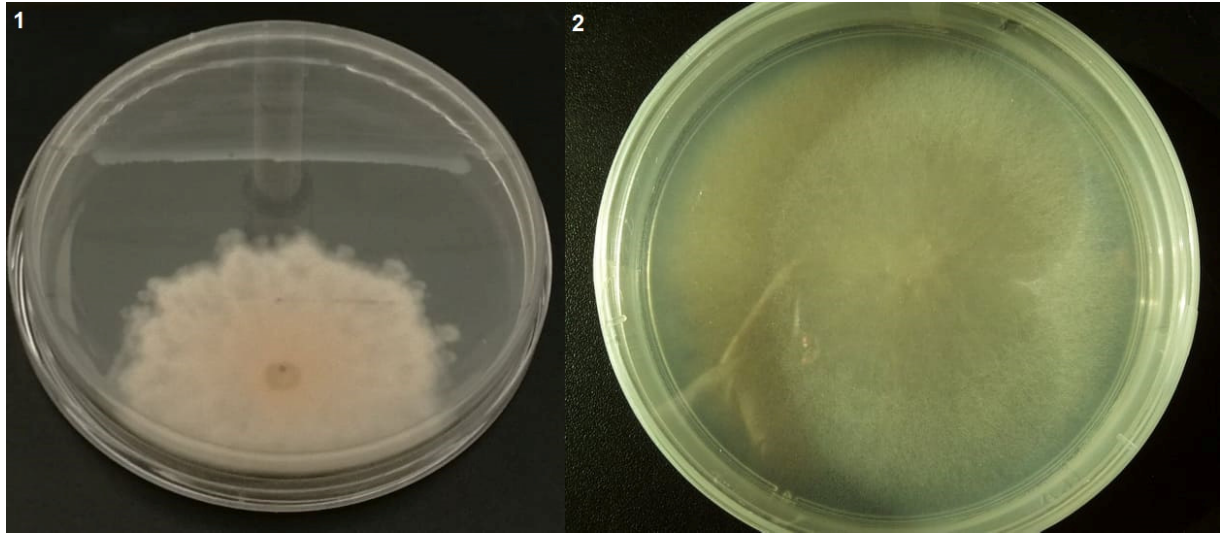

**Figure S1.** Inhibition of Foc growth by isolated *Pseudomonas*. (1) Antagonism plate, (2) Plate without bacteria (control).

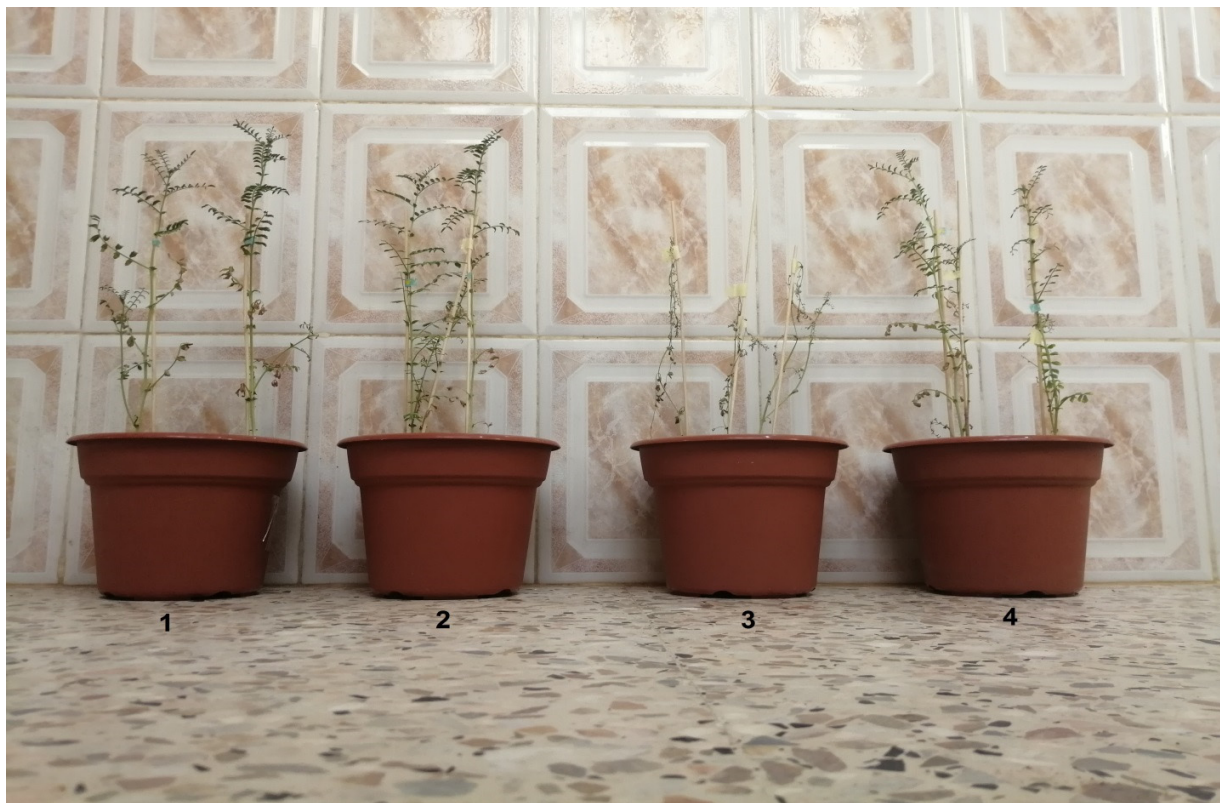

**Figure S2.** Biocontrol of Foc-S1 by isolated *Pseudomonas*. (1) Treatment with E1FP13, (2) Treatment with E1PP7, (3) Control, (4) Treatment with E1FP4.

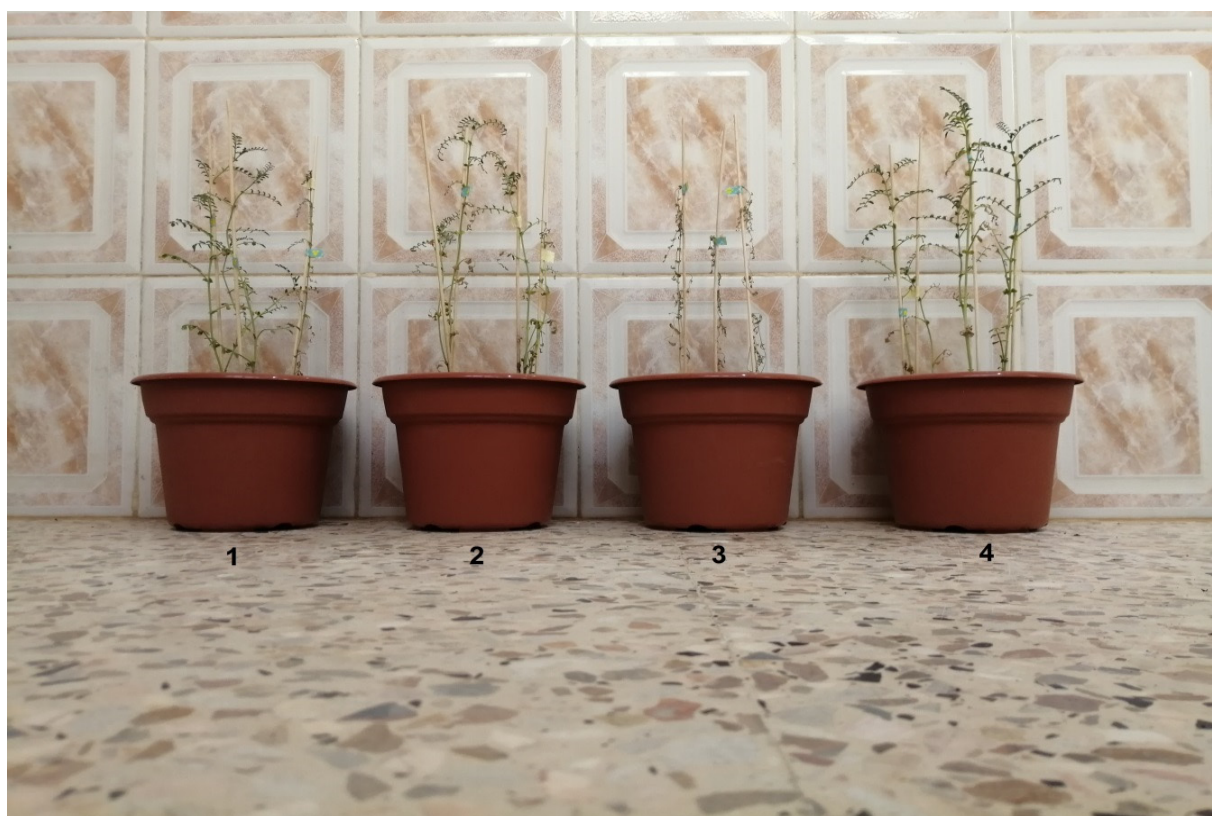

**Figure S3.** Biocontrol of Foc-S2 by isolated *Pseudomonas*. (1) Treatment with E1PP6, (2) Treatment with E1PP15, (3) Control, (4) Treatment with E1FP13.

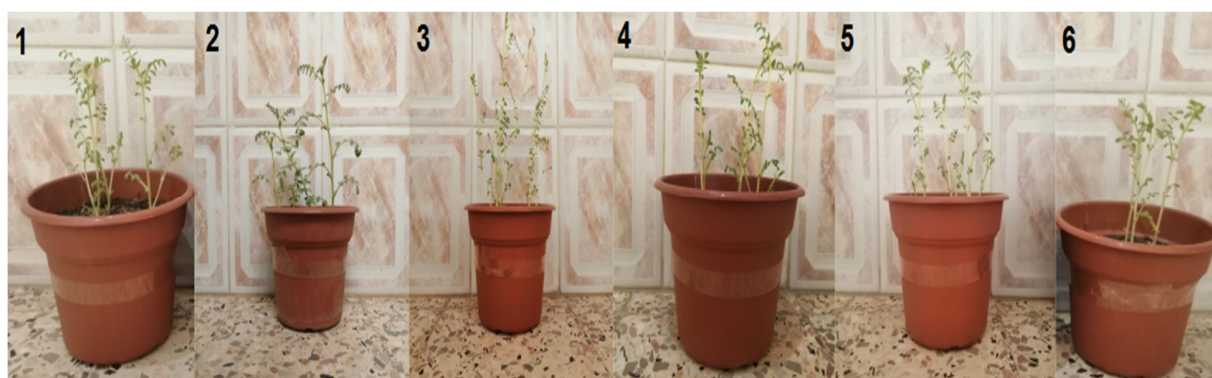

**Figure S4.** Promotion of chickpea growth by *Pseudomonas* isolates. (1) Control, (2) Treatment with E1FP13, (3) Treatment with E1PP7, (4) Treatment with E1PP6, (5) Treatment with E1FP4, (6) Treatment with E1PP15.

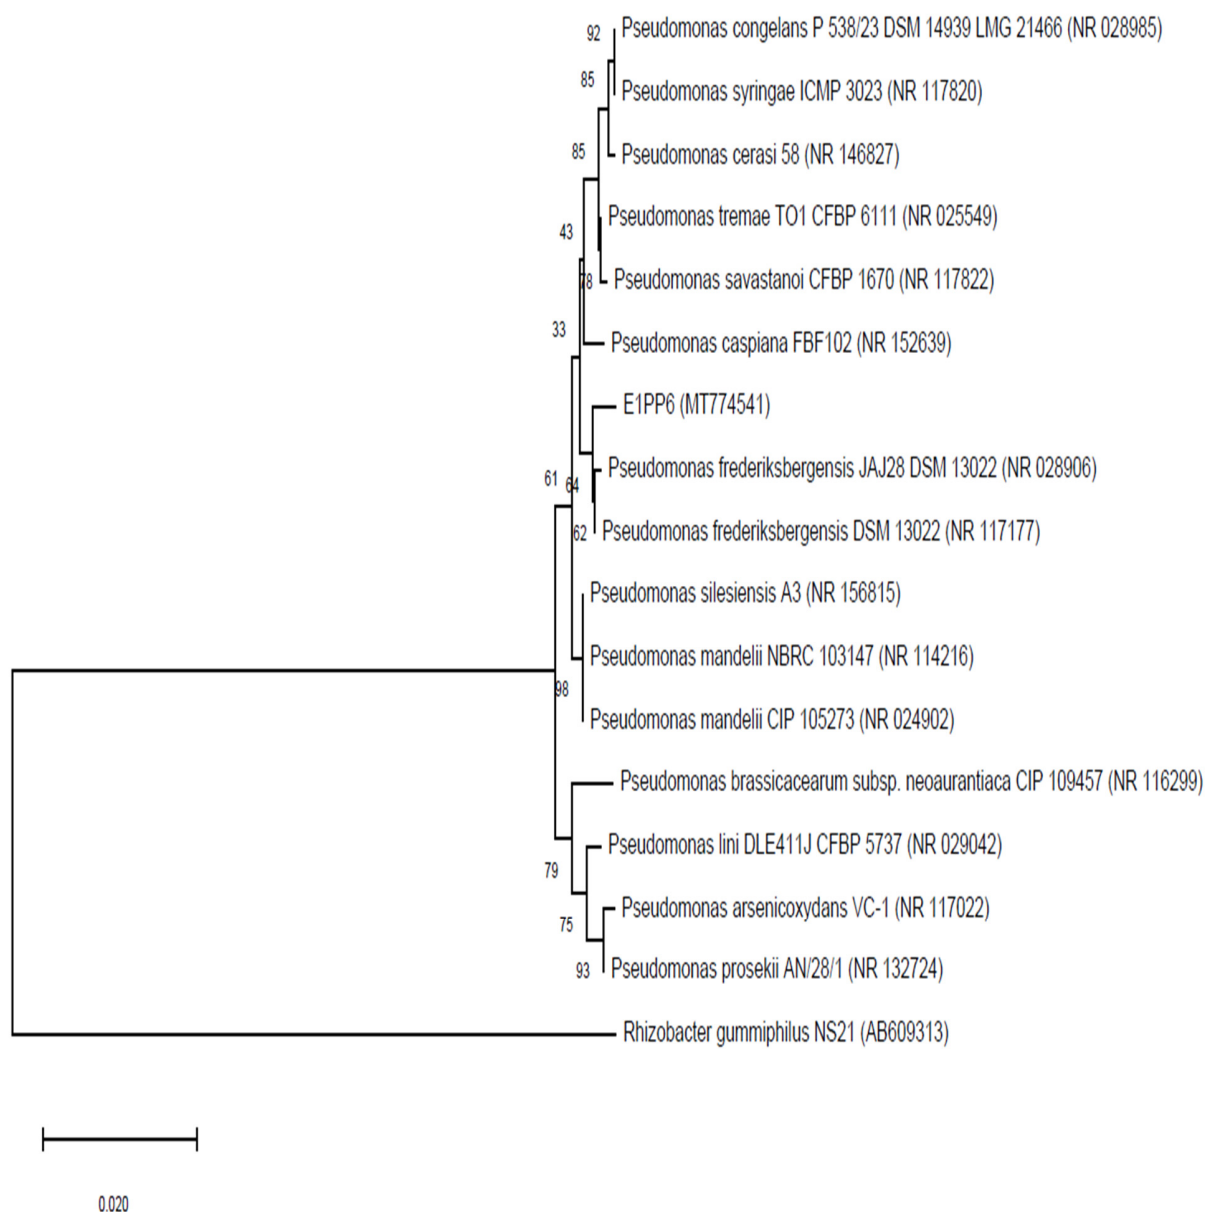

**Figure S5.** Phylogenetic tree of strain E1PP6 constructed by neighbour-joining method with Bootstrap values supporting the branches shown at the nodes, the bar indicates the number of substitutions per site.



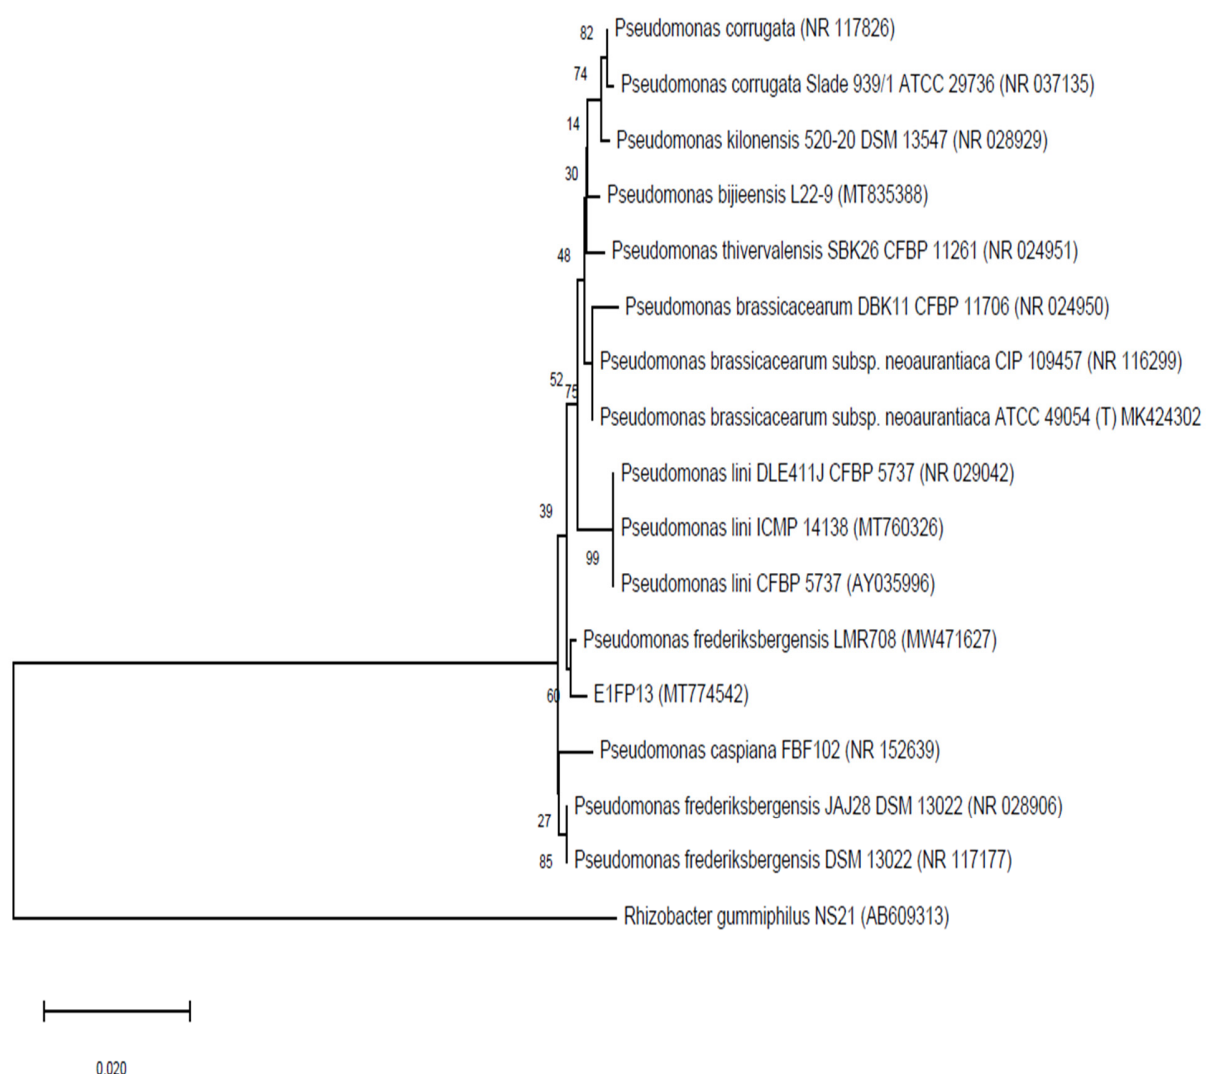

**Figure S6.** Phylogenetic tree of strain E1FP13 constructed by neighbour-joining method with Bootstrap values supporting the branches shown at the nodes, the bar indicates the number of substitutions per site.

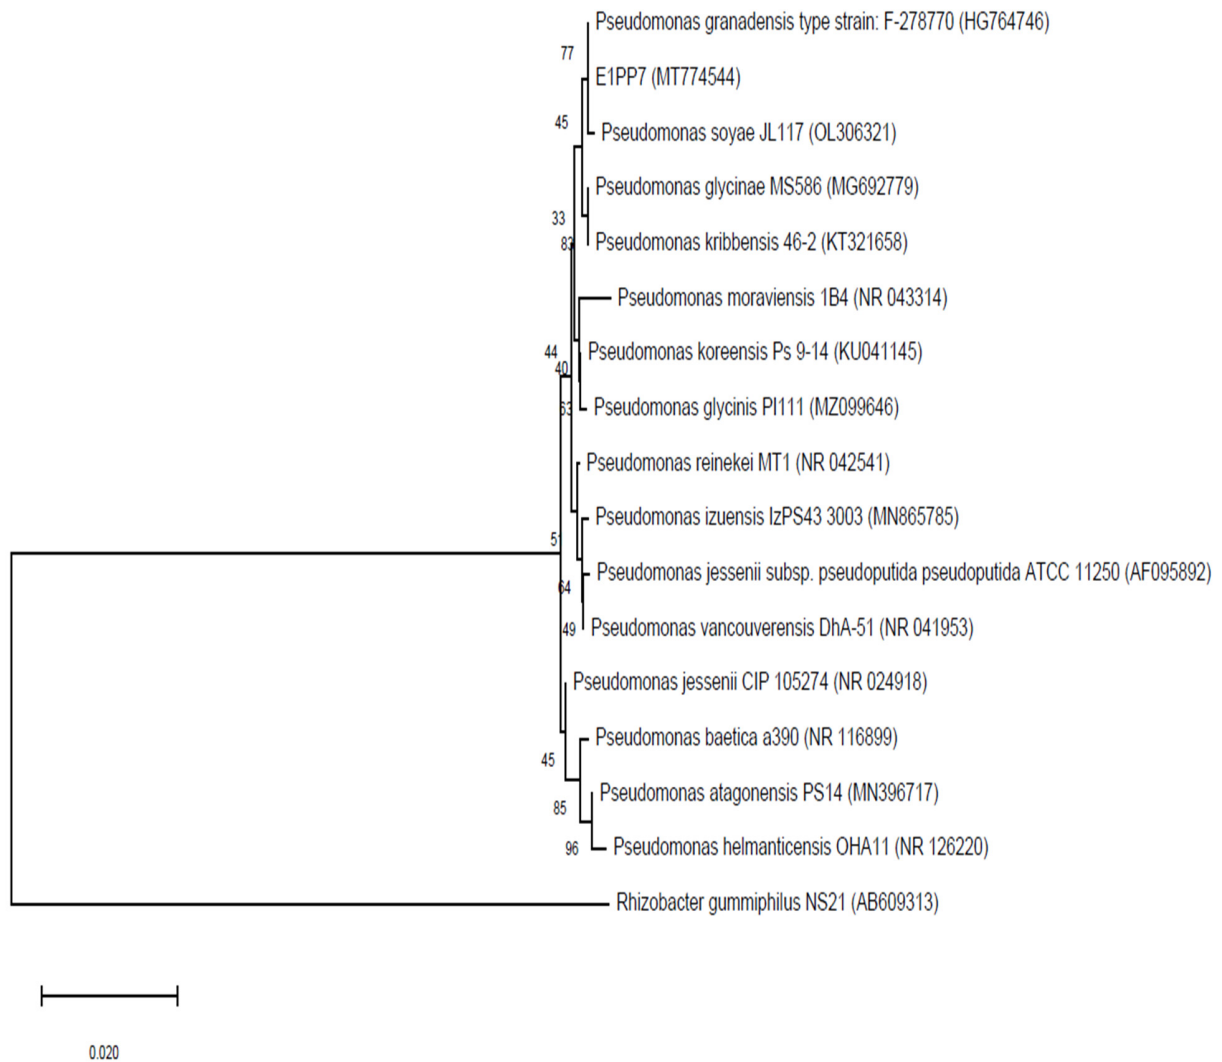

**Figure S7.** Phylogenetic tree of strain E1PP7 constructed by neighbour-joining method with Bootstrap values supporting the branches shown at the nodes, the bar indicates the number of substitutions per site.

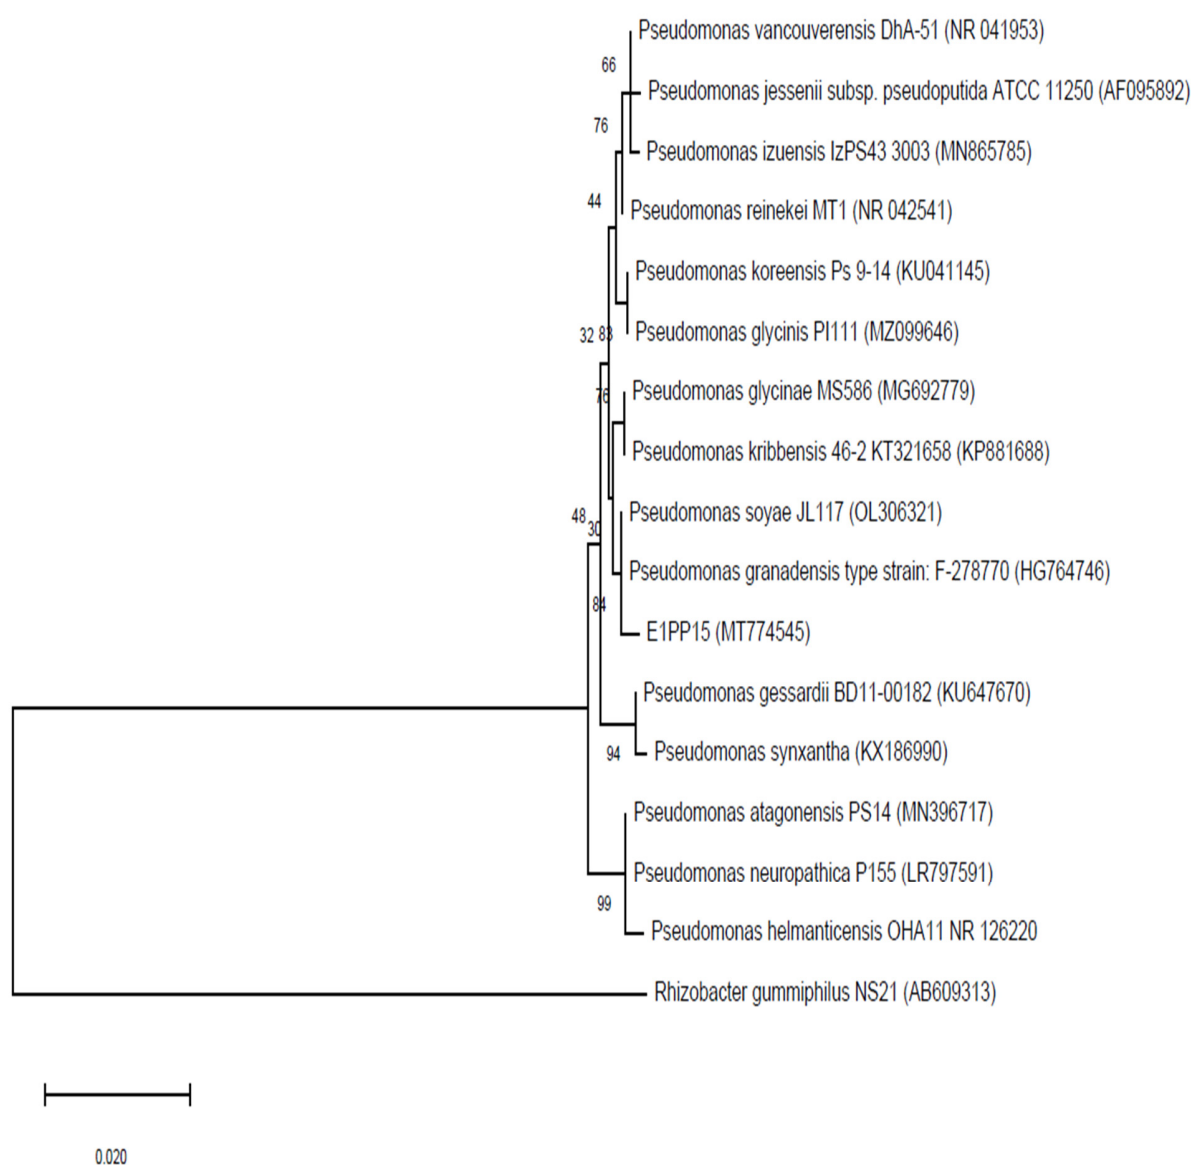

**Figure S8.** Phylogenetic tree of strain E1PP15 constructed by neighbour-joining method with Bootstrap values supporting the branches shown at the nodes, the bar indicates the number of substitutions per site.

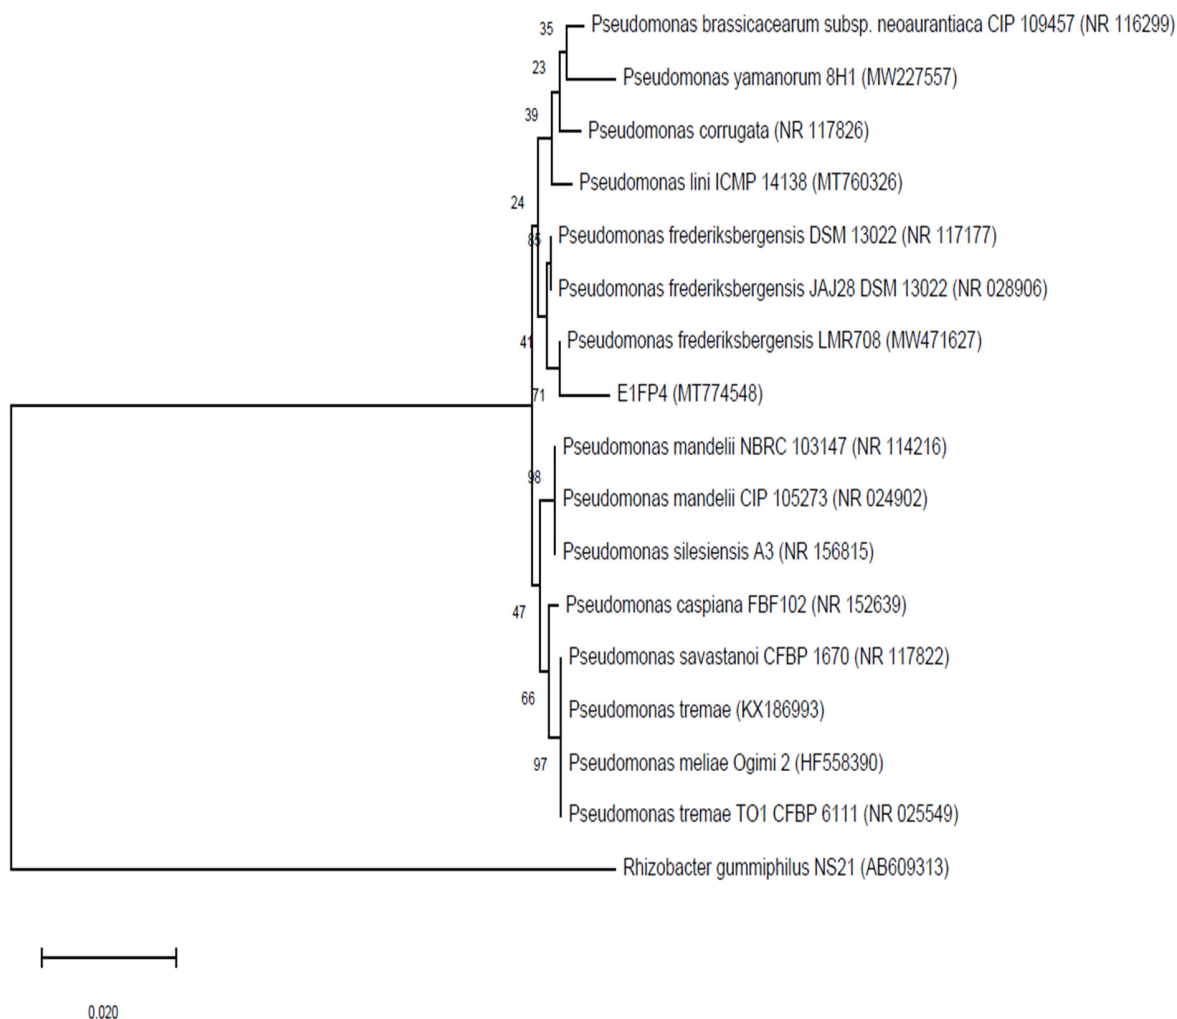

**Figure S9.** Phylogenetic tree of strain E1FP4 constructed by neighbour-joining method with Bootstrap values supporting the branches shown at the nodes, the bar indicates the number of substitutions per site.
